# Supplementary material for: Intradermal Immunization of SARS-CoV-2 Original Strain Trimeric Spike Protein Associated to CpG and AddaS03 Adjuvants, but Not MPL, Provide Strong Humoral and Cellular Response in Mice
Source: MDPI journal article supplement (doi:10.3390/vaccines10081305), 2022-08-12
Supplement: s1 [file s1]

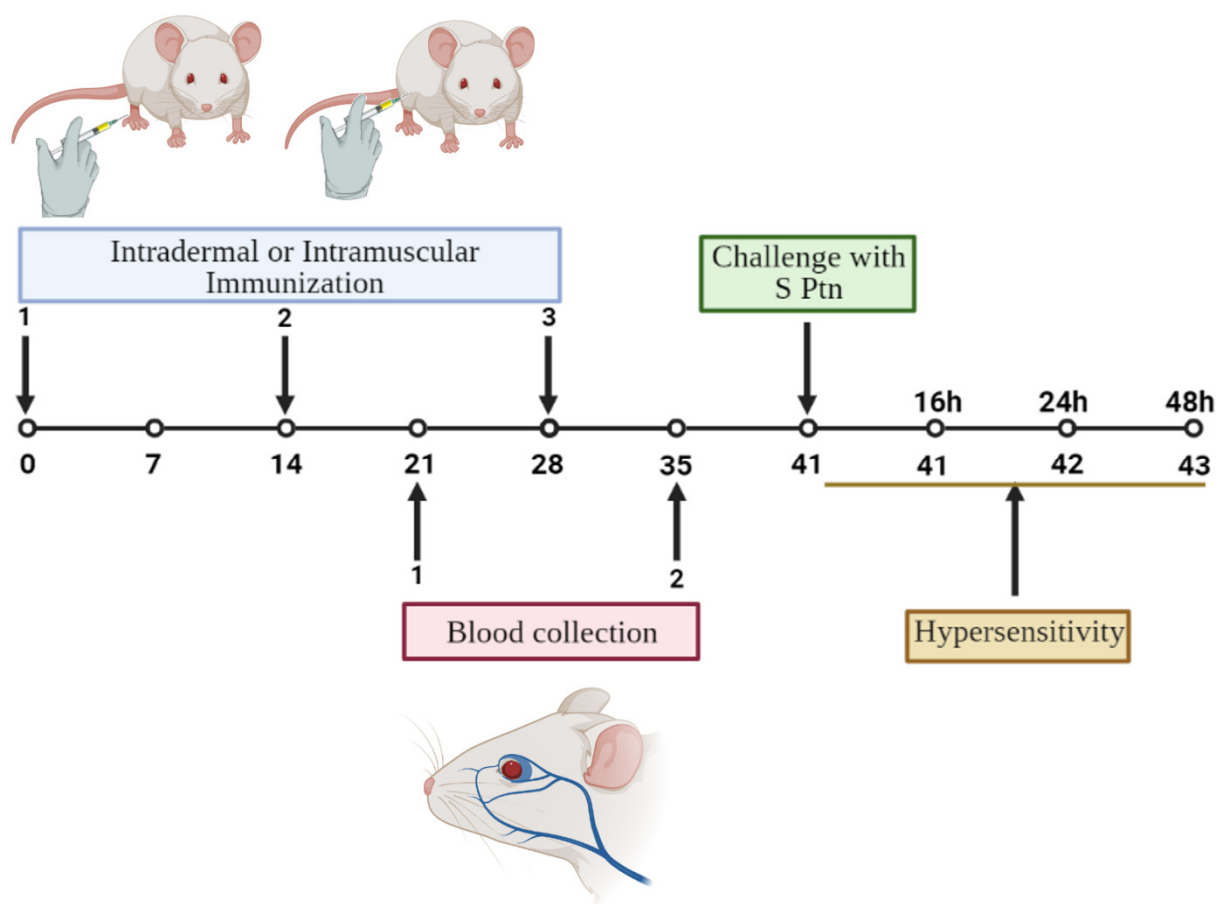

**Figure S1:** Experiments timeline: Timeline representing immunization, blood collection, challenge, and euthanasia days. Figure was made using the BioRender website and Microsoft PowerPoint.

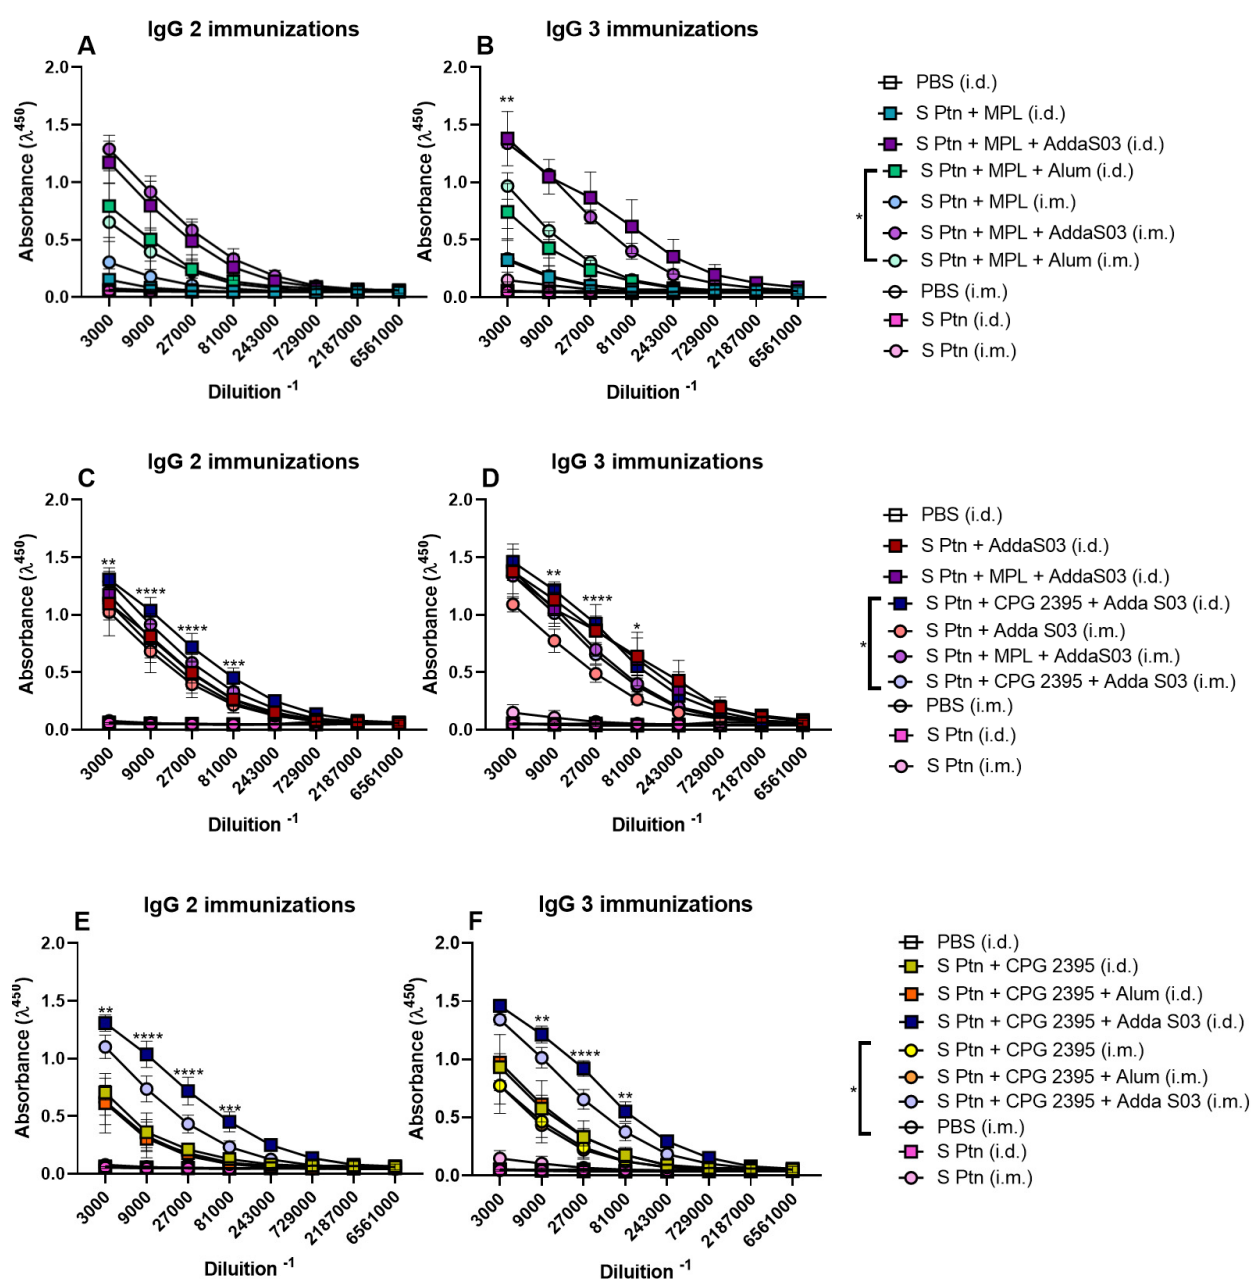

**Figure S2:** IgG curves after the first and second boosts: Mice were immunized with a 14-day interval between doses and blood samples were taken 7 days after each immunization. The serum levels of IgG were assessed by ELISA after 2 (A,C,E) and 3 (B,D,F) immunizations. Differences between the i.d. and i.m. route are shown. \*  $p < 0.05$ ; \*\*  $p < 0.01$ ; \*\*\*  $p < 0.001$ ; \*\*\*\*  $p < 0.0001$ . Two-way ANOVA. Normalized data from three independent experiments are shown. The S Ptn i.m. ( $n = 5$ ), S Ptn i.d. ( $n = 5$ ), S ptn + CPG 2395 i.m. ( $n = 5$ ), S ptn + MPL i.m. ( $n = 5$ ), S ptn + AddaS03 i.m. ( $n = 5$ ), S ptn + MPL + Alum i.m. ( $n = 5$ ), S ptn + CPG 2395 + Alum i.m. ( $n = 5$ ), S ptn + CPG 2395 + AddaS03 i.m. ( $n = 5$ ), S ptn + CPG 2395 i.d. ( $n = 5$ ), S ptn + MPL i.d. ( $n = 5$ ), S ptn + MPL + AddaS03 i.d. ( $n = 5$ ), S ptn + MPL + Alum i.d. ( $n = 5$ ), S ptn + CPG 2395 + Alum i.d. ( $n = 5$ ) and S ptn + CPG 2395 + AddaS03 i.d. ( $n = 5$ ) groups were assessed in one experiment. The PBS i.m. ( $n = 8$ ), and S ptn + AddaS03 i.d. ( $n = 10$ ) groups were assessed in two independent experiments. The PBS i.d. ( $n = 10$ ) group was assessed in three independent experiments.

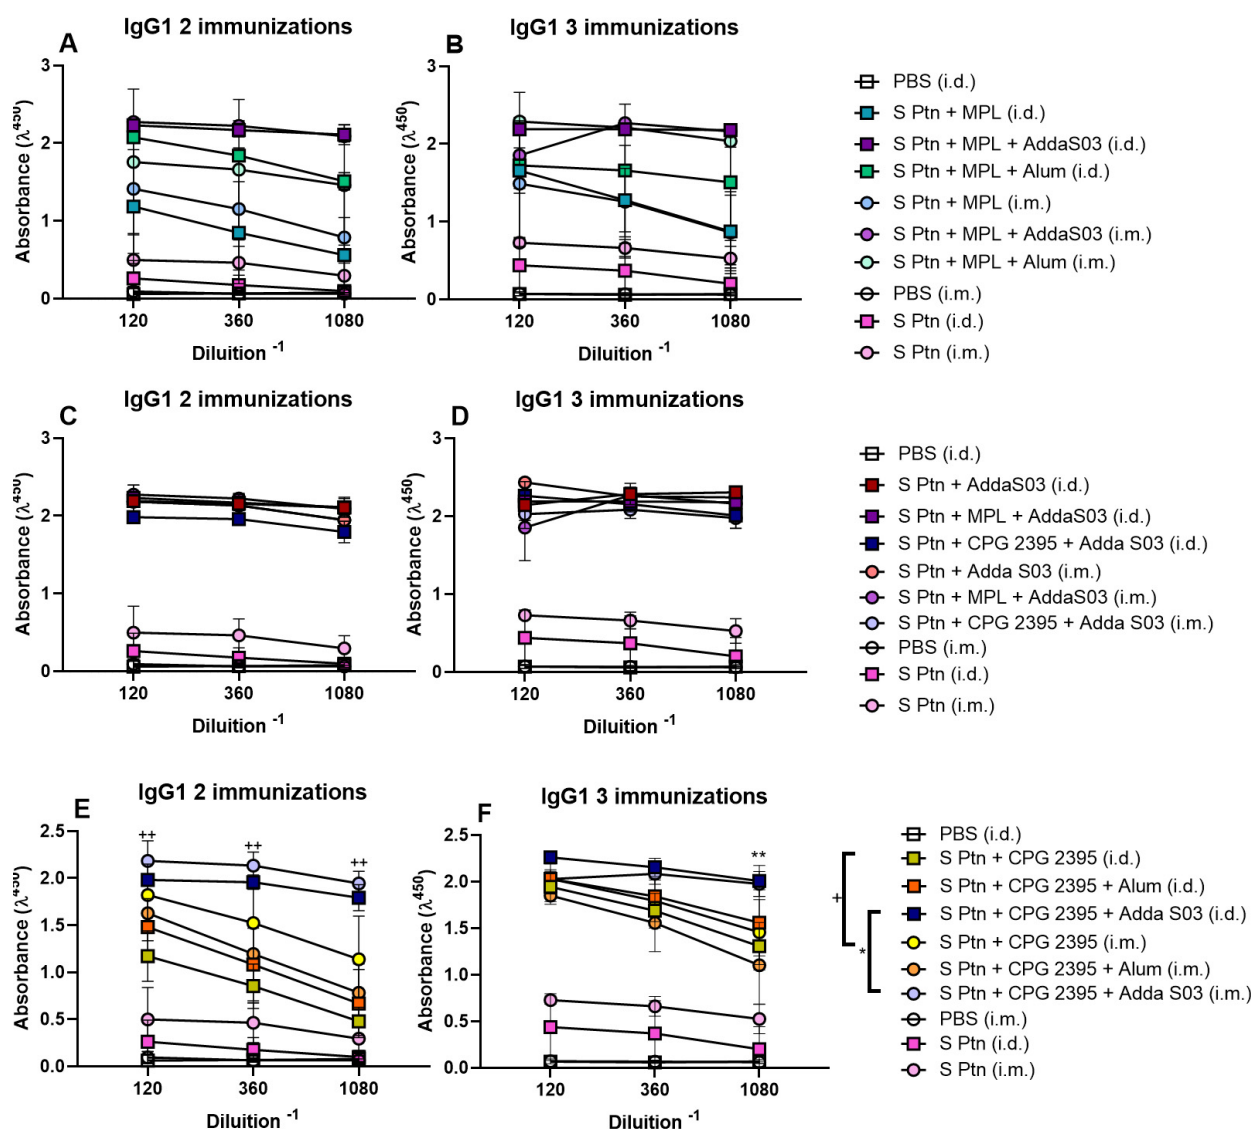

**Figure S3:** IgG1 curves after the first and second boosts: The mice were immunized with a 14-day interval between doses and blood samples were taken 7 days after each immunization. The serum levels of IgG1 were assessed by ELISA after 2 (A,C,E) and 3 (B,D,F) immunizations. Differences between the i.d. and i.m. routes are shown. \*\* or ++  $p < 0.01$ . Two-way ANOVA. Normalized data from three independent experiments are shown. The S Ptn i.m. (n = 5), S Ptn i.d. (n = 5), S ptn + CPG 2395 i.m. (n = 5), S ptn + MPL i.m. (n = 5), S ptn + AddaS03 i.m. (n = 5), S ptn + MPL + Alum i.m. (n = 5), S ptn + CPG 2395 + Alum i.m. (n = 5), S ptn + CPG 2395 + AddaS03 i.m. (n = 5), S ptn + CPG 2395 i.d. (n = 5), S ptn + MPL i.d. (n = 5), S ptn + MPL + AddaS03 i.d. (n = 5), S ptn + MPL + Alum i.d. (n = 5), S ptn + CPG 2395 + Alum i.d. (n = 5), and S ptn + CPG 2395 + AddaS03 i.d. (n = 5) groups were assessed in one experiment. The PBS i.m. (n = 8) and S ptn + AddaS03 i.d. (n = 10) groups were assessed in two independent experiments. The PBS i.d. (n = 10) group was assessed in three independent experiments.

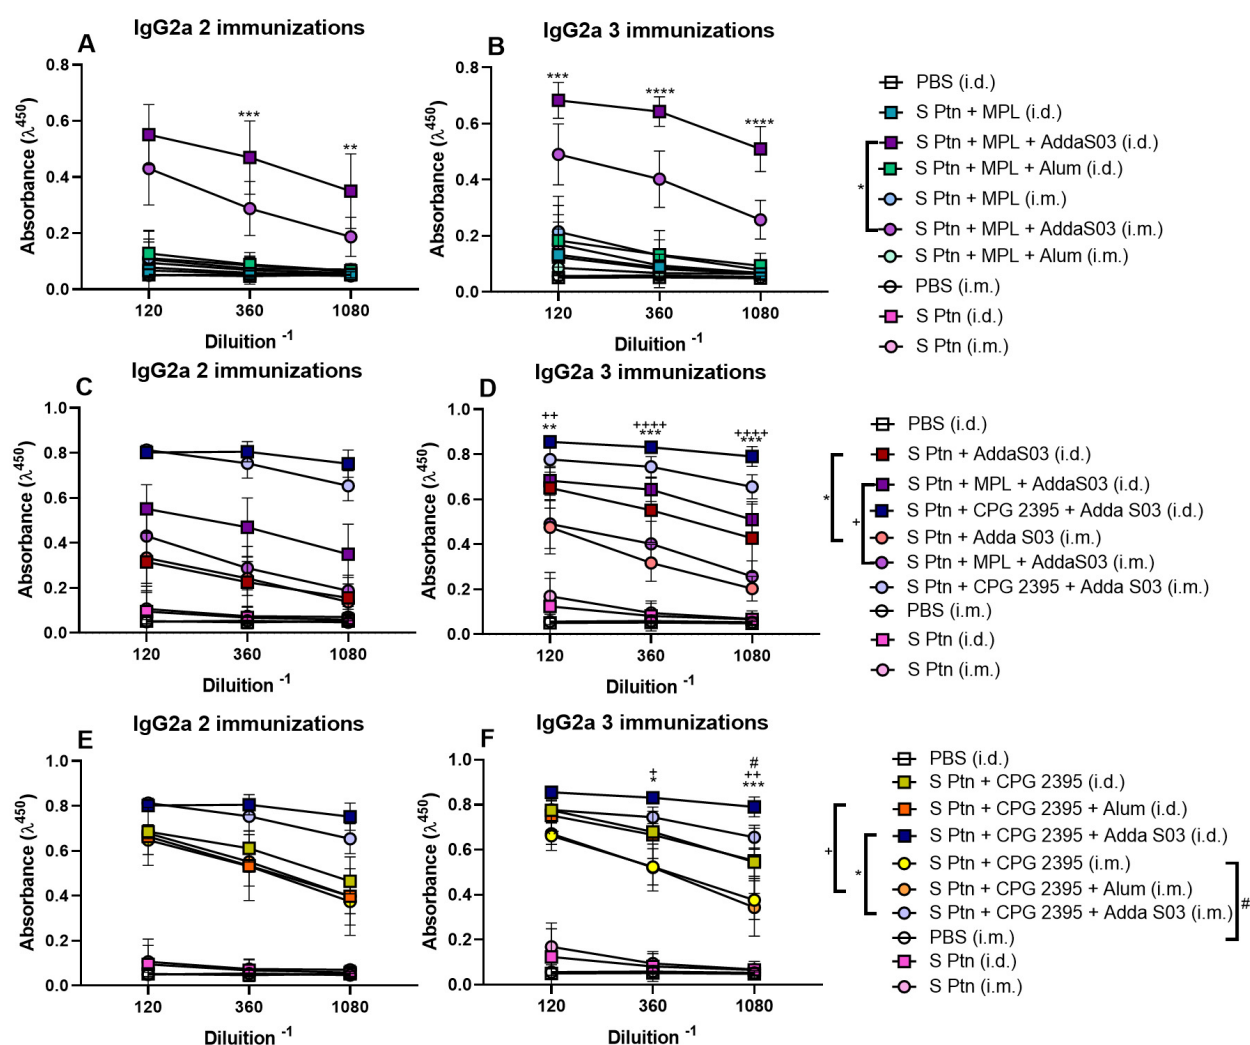

**Figure S4: IgG2a curves after the first and second boosts:** The mice were immunized with a 14-day interval between doses and blood samples were taken 7 days after each immunization. The serum levels of IgG2a were assessed by ELISA after 2 (A,C,E) and 3 (B,D,F) immunizations. Differences between the i.d. and i.m. route are shown. \*, # or +  $p < 0.05$ ; \*\* or ++  $p < 0.01$ ; \*\*\*  $p < 0.001$ ; \*\*\*\* or ++++  $p < 0.0001$ . Two-way ANOVA. Normalized data from three independent experiments are shown. The S Ptn i.m. (n = 5), S Ptn i.d. (n = 5), S ptn + CPG 2395 i.m. (n = 5), S ptn + MPL i.m. (n = 5), S ptn + AddaS03 i.m. (n = 5), S ptn + MPL + Alum i.m. (n = 5), S ptn + CPG 2395 + Alum i.m. (n = 5), S ptn + CPG 2395 + AddaS03 i.m. (n = 5), S ptn + CPG 2395 i.d. (n = 5), S ptn + MPL i.d. (n = 5), S ptn + MPL + AddaS03 i.d. (n = 5), S ptn + MPL + Alum i.d. (n = 5), S ptn + CPG 2395 + Alum i.d. (n = 5) and S ptn + CPG 2395 + AddaS03 i.d. (n = 5) groups were assessed in one experiment. The PBS i.m. (n = 8) and S ptn + AddaS03 i.d. (n = 10) groups were assessed in two independent experiments. The PBS i.d. (n = 10) group was assessed in three independent experiments.
